# Supplementary material for: Optimization of Urban Water Consumption in Residential Buildings
Source: MDPI journal article supplement (doi:10.3390/su15107952), 2023-05-12
Supplement: s1 [file s1]

## Supplementary material

**Table S1:** GW systems removal efficiency of each quality index.

| Treatment Types         | GW System                              | TSS   | Turbidity | COD   | BOD5  | TN    | TP    | Faecal Coliform | Reference                                                |
|-------------------------|----------------------------------------|-------|-----------|-------|-------|-------|-------|-----------------|----------------------------------------------------------|
| Physical Treatment      | Screening+ Sedimentation+ Disinfection | 57.7% | 17.5%     | 54.4% | N/A   | 37.7% | N/A   | N/A             | March et al. (2003)                                      |
| Biological Treatment    | RBC                                    | 92.8% | 98.0%     | 79.0% | 96.0% | N/A   | N/A   | 100.0%          | Gross et al. (2015) & Abdel Kader (2012)                 |
| Advanced Treatment      | Electro-Coagulation                    | 69.0% | 91.6%     | 60.0% | 61.0% | 60.0% | 65.0% | N/A             | Piduo (2006), Lin et al. (2005), & Ozyonar et al. (2010) |
| Biological Treatment    | MBR                                    | 99.0% | 98.5%     | 97.0% | 99.0% | 68.5% | 19.0% | 100.0%          | Friedler et al. (2006) & Boana et al. (2020)             |
| Natural based Treatment | CW                                     | 98.0% | 91.0%     | 93.0% | 98.0% | 59.0% | 63.0% | 100.0%          | Boana et al. (2020)                                      |
