# Supplementary material for: Optimization of Urban Water Consumption in Residential Buildings
Source: MDPI journal article supplement (doi:10.3390/su15107952), 2023-05-12
Supplement: s1 [file s1]

Archive with 1 entries (1 files):
- sustainability-2273041-supplementary.pdf
